# Supplementary material for: Mindfulness and compassion training on daily work with patients and within the multiprofessional palliative care team: a retrospective self-assessment study
Source: Springer Nature journal article supplement (doi:10.1186/s12904-023-01158-9), 2023-04-10
Supplement: MOESM2 [file 25225710]

**Teil 1 von 4:**

Waren Sie beim Einführungs-Samstag am 06.01.2018?

ja                       nein

Haben Sie vier oder mehr der Dienstag-Abend-Veranstaltungen besucht?

ja                       nein

Wieviele, der 6 Dienstag-Abend-Veranstaltungen haben Sie besucht? \_\_\_\_\_

Haben Sie vier oder mehr der Mittwoch-Achtsamkeitstage miterlebt?

ja                       nein

Wieviele der 7 Mittwoch-Achtsamkeitstage haben Sie miterlebt? \_\_\_\_\_

Alter: \_\_\_\_\_ Jahre

**Geschlecht:**

weiblich                       männlich

**Beruf:**

|                          |                          |                          |                          |                          |
|--------------------------|--------------------------|--------------------------|--------------------------|--------------------------|
| Pflege                   | Arzt/Ärztin              | Physiotherapie           | Psychologie              | Sozialdienst             |
| <input type="checkbox"/> | <input type="checkbox"/> | <input type="checkbox"/> | <input type="checkbox"/> | <input type="checkbox"/> |

weitere: \_\_\_\_\_

**Vorerfahrung mit Achtsamkeitstechniken:**

ja                       nein

Wenn ja, welche: \_\_\_\_\_

**Teil 2 von 4:**

1. Wie zufrieden waren Sie insgesamt mit dem Kurs?

|                          |                          |                          |                          |                          |
|--------------------------|--------------------------|--------------------------|--------------------------|--------------------------|
| sehr<br>unzufrieden      | eher<br>unzufrieden      | teils/teils              | eher<br>zufrieden        | sehr<br>zufrieden        |
| <input type="checkbox"/> | <input type="checkbox"/> | <input type="checkbox"/> | <input type="checkbox"/> | <input type="checkbox"/> |

2. Würden Sie den Kurs anderen MitarbeiterInnen im palliativen Bereich empfehlen?

|                          |                          |                          |                          |                          |
|--------------------------|--------------------------|--------------------------|--------------------------|--------------------------|
| nein                     | eher<br>nicht            | vielleicht               | eher<br>ja               | ja                       |
| <input type="checkbox"/> | <input type="checkbox"/> | <input type="checkbox"/> | <input type="checkbox"/> | <input type="checkbox"/> |

3. Wie zufrieden waren Sie mit der Art der Kursleitung?

|                          |                          |                          |                          |                          |
|--------------------------|--------------------------|--------------------------|--------------------------|--------------------------|
| sehr<br>unzufrieden      | eher<br>unzufrieden      | teils/teils              | eher<br>zufrieden        | sehr<br>zufrieden        |
| <input type="checkbox"/> | <input type="checkbox"/> | <input type="checkbox"/> | <input type="checkbox"/> | <input type="checkbox"/> |

4. Planen Sie, die im Kurs erlernten Techniken in Zukunft einzusetzen?

ja       nein

5. Was ist Ihnen in besonderer Erinnerung geblieben?

Erlebnisse/ Gefühle/ Besonderheiten/ Kritik/ Wünsche:

---

---

---

---

---

---

---

---

**Teil 3 von 4:**

Wie schätzen Sie sich persönlich bezüglich der folgenden Aussagen ein?

→ **Achtung: Zum Zeitpunkt VOR dem Projekt** ←

| Nr. | Item                                                                                                            | Trifft gar nicht zu | Trifft eher nicht zu | neutral | Trifft eher zu | Trifft voll zu |
|-----|-----------------------------------------------------------------------------------------------------------------|---------------------|----------------------|---------|----------------|----------------|
| 1   | Ich bin vertraut mit Techniken der Achtsamkeit/ Selbstfürsorge.                                                 |                     |                      |         |                |                |
| 2   | Ich wende Techniken der Achtsamkeit/ Selbstfürsorge zu Hause im Alltag an.                                      |                     |                      |         |                |                |
| 3   | Ich integriere Techniken der Achtsamkeit/ Selbstfürsorge in meinen beruflichen Alltag auf der Palliativstation. |                     |                      |         |                |                |
| 4   | Auch in belastenden Situationen behalte ich Kontakt zu einer Art innerem Frieden in mir.                        |                     |                      |         |                |                |
| 5   | Ich nehme Gefühle der körperlichen Anspannung und des Unbehagens frühzeitig wahr.                               |                     |                      |         |                |                |
| 6   | Wenn ich oben genannte Gefühle wahrnehme, gehe ich diesen im Sinne der Selbstfürsorge nach.                     |                     |                      |         |                |                |
| 7   | Ich erlebe einen achtsamen Kontakt zu den anderen Team-Mitgliedern.                                             |                     |                      |         |                |                |
| 8   | Ich nehme mir Zeit zum Essen (esse achtsam).                                                                    |                     |                      |         |                |                |
| 9   | Ich habe einen „Anker“, der mich z. B. zwischen zwei Patientengesprächen ins „Hier und Jetzt“ bringt.           |                     |                      |         |                |                |
| 10  | Auch in schwierigen Situationen kann ich eine mitfühlende Haltung einnehmen.                                    |                     |                      |         |                |                |
| 11  | Durch die Anwendung von Achtsamkeitstechniken kann ich während eines Arbeitstags Kraft sammeln.                 |                     |                      |         |                |                |
| 12  | Wenn ich angespannt bin, kann ich mich bewusst entspannen.                                                      |                     |                      |         |                |                |
| 13  | Ich kann mich selbst wertschätzen.                                                                              |                     |                      |         |                |                |
| 14  | Ich kann meine Fehler sehen, ohne mich selbst dafür zu verurteilen.                                             |                     |                      |         |                |                |
| 15  | Ich bin geduldig mit mir selbst.                                                                                |                     |                      |         |                |                |
| 16  | Ich bin geduldig mit anderen.                                                                                   |                     |                      |         |                |                |
| 17  | Ich kann meine Gefühle wahrnehmen, ohne mich darin zu verlieren oder darunter zu leiden.                        |                     |                      |         |                |                |
| 18  | Während meiner Arbeit fühle ich mich mit dem „Hier und Jetzt“ verbunden.                                        |                     |                      |         |                |                |
| 19  | Ich bin vertraut mit Metta-Meditation (Mitgefühl).                                                              |                     |                      |         |                |                |
| 20  | Ich kann Metta-Meditation (Mitgefühl) anwenden, um belastende Situationen erträglicher zu erleben.              |                     |                      |         |                |                |
| 21  | Ich bin vertraut mit Tonglen (Geben und Nehmen-Meditation).                                                     |                     |                      |         |                |                |
| 22  | Ich kann Tonglen anwenden, um belastende Situationen erträglicher zu erleben.                                   |                     |                      |         |                |                |

**Teil 4 von 4:**

Wie schätzen Sie sich persönlich bezüglich der folgenden Aussagen ein?

→ JETZT, zum Zeitpunkt NACH dem Projekt ←

| Nr. | Item                                                                                                            | Trifft gar nicht zu | Trifft eher nicht zu | neutral | Trifft eher zu | Trifft voll zu |
|-----|-----------------------------------------------------------------------------------------------------------------|---------------------|----------------------|---------|----------------|----------------|
| 1   | Ich bin vertraut mit Techniken der Achtsamkeit/ Selbstfürsorge.                                                 |                     |                      |         |                |                |
| 2   | Ich wende Techniken der Achtsamkeit/ Selbstfürsorge zu Hause im Alltag an.                                      |                     |                      |         |                |                |
| 3   | Ich integriere Techniken der Achtsamkeit/ Selbstfürsorge in meinen beruflichen Alltag auf der Palliativstation. |                     |                      |         |                |                |
| 4   | Auch in belastenden Situationen behalte ich Kontakt zu einer Art innerem Frieden in mir.                        |                     |                      |         |                |                |
| 5   | Ich nehme Gefühle der körperlichen Anspannung und des Unbehagens frühzeitig wahr.                               |                     |                      |         |                |                |
| 6   | Wenn ich oben genannte Gefühle wahrnehme, gehe ich diesen im Sinne der Selbstfürsorge nach.                     |                     |                      |         |                |                |
| 7   | Ich erlebe einen achtsamen Kontakt zu den anderen Team-Mitgliedern.                                             |                     |                      |         |                |                |
| 8   | Ich nehme mir Zeit zum Essen (esse achtsam).                                                                    |                     |                      |         |                |                |
| 9   | Ich habe einen „Anker“, der mich z. B. zwischen zwei Patientengesprächen ins „Hier und Jetzt“ bringt.           |                     |                      |         |                |                |
| 10  | Auch in schwierigen Situationen kann ich eine mitfühlende Haltung einnehmen.                                    |                     |                      |         |                |                |
| 11  | Durch die Anwendung von Achtsamkeitstechniken kann ich während eines Arbeitstags Kraft sammeln.                 |                     |                      |         |                |                |
| 12  | Wenn ich angespannt bin, kann ich mich bewusst entspannen.                                                      |                     |                      |         |                |                |
| 13  | Ich kann mich selbst wertschätzen.                                                                              |                     |                      |         |                |                |
| 14  | Ich kann meine Fehler sehen, ohne mich selbst dafür zu verurteilen.                                             |                     |                      |         |                |                |
| 15  | Ich bin geduldig mit mir selbst.                                                                                |                     |                      |         |                |                |
| 16  | Ich bin geduldig mit anderen.                                                                                   |                     |                      |         |                |                |
| 17  | Ich kann meine Gefühle wahrnehmen, ohne mich darin zu verlieren oder darunter zu leiden.                        |                     |                      |         |                |                |
| 18  | Während meiner Arbeit fühle ich mich mit dem „Hier und Jetzt“ verbunden.                                        |                     |                      |         |                |                |
| 19  | Ich bin vertraut mit Metta-Meditation (Mitgefühl).                                                              |                     |                      |         |                |                |
| 20  | Ich kann Metta-Meditation (Mitgefühl) anwenden, um belastende Situationen erträglicher zu erleben.              |                     |                      |         |                |                |
| 21  | Ich bin vertraut mit Tonglen (Geben und Nehmen-Meditation).                                                     |                     |                      |         |                |                |
| 22  | Ich kann Tonglen anwenden, um belastende Situationen erträglicher zu erleben.                                   |                     |                      |         |                |                |
